# Supplementary material for: Identifying pathways modulating sleep duration: from genomics to transcriptomics
Source: PubMed Central journal article supplement (PMC5496883; doi:10.1038/s41598-017-04027-7), 2017-07-04
Supplement: 41598_2017_4027_MOESM1_ESM.pdf [file 41598_2017_4027_MOESM1_ESM.pdf]

## Supplementary Information for

# Identifying pathways modulating sleep duration: from genomics to transcriptomics

Karla V. Allebrandt<sup>1\*</sup>, Maris Teder-Laving<sup>2</sup>, Paola Cusumano<sup>3</sup>, Goar Frishman<sup>4</sup>, Rosa Levandovski<sup>5</sup>, Andreas Ruepp<sup>4</sup>, Maria P. L. Hidalgo<sup>5</sup>, Rodolfo Costa<sup>3</sup>, Andres Metspalu<sup>2</sup>, Till Roenneberg<sup>1</sup> and Cristiano De Pittà<sup>3</sup>.

<sup>1</sup> Institute of Medical Psychology, Ludwig-Maximilians-University, Munich, Germany;

<sup>2</sup> Estonian Genome Center and Institute of Molecular and Cell Biology of University of Tartu, Estonian Biocentre, Tartu, Estonia;

<sup>3</sup> Department of Biology, University of Padova, Padova, Italy;

<sup>4</sup> Institute for Bioinformatics and Systems Biology (GmbH); Helmholtz Center Munich, German Research Center for Environmental Health, Neuherberg, Germany;

<sup>5</sup> Departamento de Psiquiatria e Medicina Legal, Universidade Federal do Rio Grande do Sul (UFRGS), Porto Alegre, Brazil.

\*Correspondence to: Dr. Karla V. Allebrandt

Medical Faculty, Ludwig-Maximilians-University, Goethestr. 31. D-80336 Munich

E-mail: karlaviviani.allebrandt@gmail.com

This file includes:

Supplementary Figures: 12

Supplementary Tables: 9

Supplementary Materials and Methods

Acknowledgments

Supplementary References

## SUPPLEMENTARY FIGURES AND TABLES

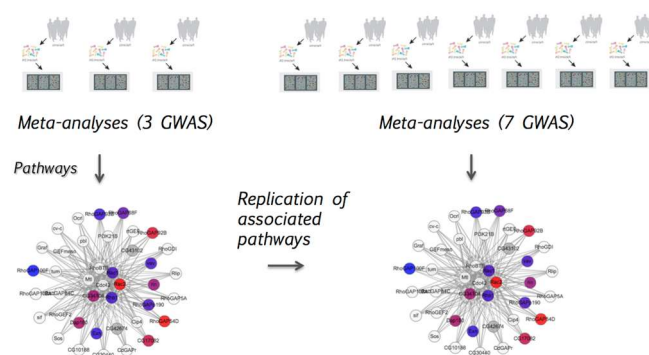

**Figure S1.** Study design. We conducted gene set enrichment analyses (GSEA4GWAS) by using the results of two independent meta-analyses for sleep duration (first contained 3 GWAS reported in the current study and second contained GWAS in 7 populations reported previously<sup>1</sup>). With this method we identified significant pathways associated with sleep duration. Only two main kinds of signaling pathways (ion channel genes and the ERBB signalling family of tyrosin kinases) associated with sleep duration in both of the meta-analysis results used for the GSEA (Table 2). To visualize how the genes belonging to those pathways interact (bottom panel), we used a multifactorial interaction network, combining information from the literature and on gene expression of their homologs in a *Drosophila* short sleeping model. This multifactorial interaction network containing gene-gene, gene-protein interaction, and gene relation to disease development is presented in Figure 1 of the original manuscript.

| WGGT of blood versus saliva DNA samples |            |        |        |
|-----------------------------------------|------------|--------|--------|
| Samples                                 | Concordant | Errors | Total  |
| 1                                       | 699738     | 1829   | 701567 |
| 2                                       | 724203     | 32     | 724235 |
| 3                                       | 589110     | 10475  | 599585 |
| 4                                       | 728299     | 25     | 728324 |
| 5                                       | 730008     | 17     | 730025 |
| 6                                       | 728030     | 24     | 728054 |
| 7                                       | 728136     | 47     | 728183 |
| 8                                       | 718739     | 112    | 718851 |
| 9                                       | 727608     | 20     | 727628 |
| 10                                      | 720866     | 239    | 721105 |

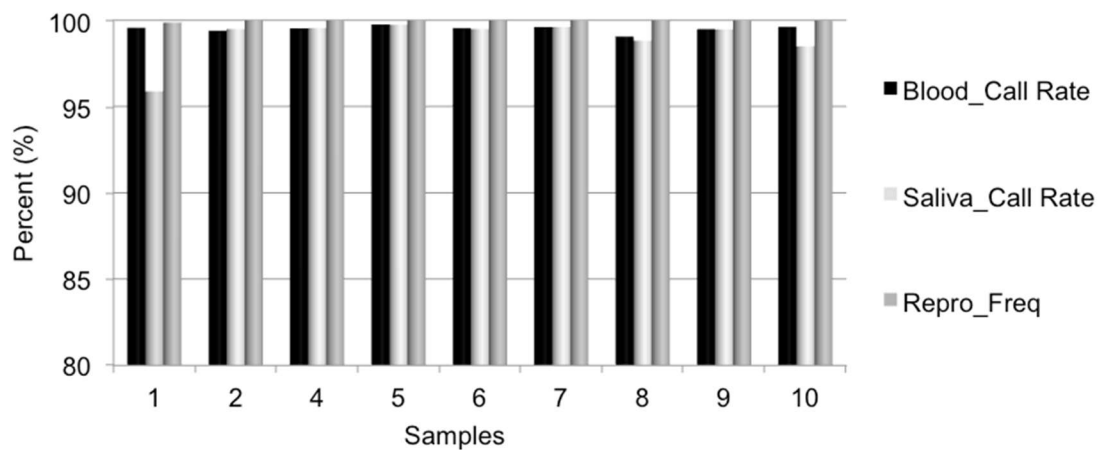

**Figure S2.** Whole-genome genotyping (WGGT) of intra-individual saliva and blood DNA samples. To test the reliability of the method, we evaluated here the concordance rates between 10 saliva- versus the respective individual blood-extracted DNA samples with the same high-density genotyping array (Illumina Human OmniExpress 700K). Genotypes were consistent across sources of biological material (upper Table); concordance rates between genotype calls of saliva- versus blood-extracted DNA samples from the same individuals were  $> 99.9 \pm 3$ . Genotyping efficiency based on average genotype call rates (bottom panel) was similar for saliva- ( $97.3 \pm 5\%$ ) and blood-extracted ( $99.5 \pm 0.2\%$ ) DNA. Although blood-extracted DNA provides higher quality DNA, saliva-extracted DNA has proven to be a reliable method to obtain biological material for high-density genotyping arrays, being used in the GEC cohort.

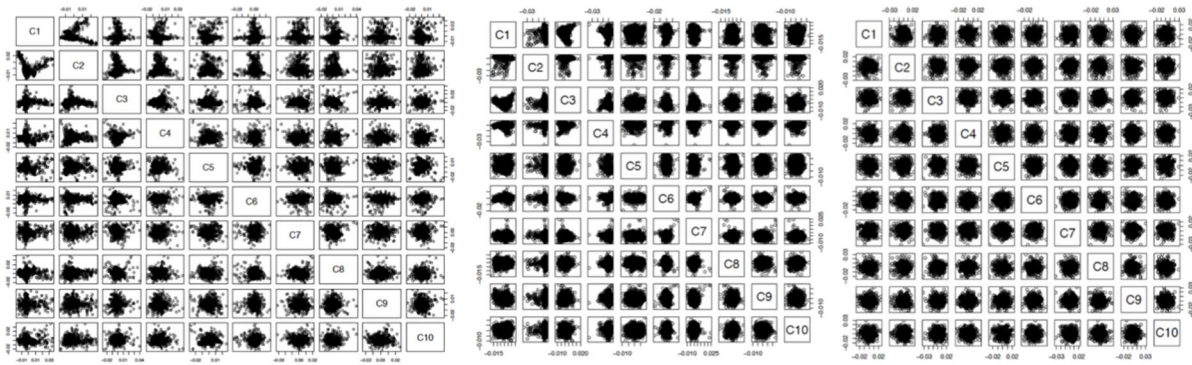

**Figure S3.** Multidimensional scaling plots showing components 1:10, which were used to adjust for population stratification in the analyses conducted with BREC (left panel), EGCUT (middle panel). GEC (right panel) did not present population stratification (inflation factor = 1) and association analyses were performed without adjustments for components.

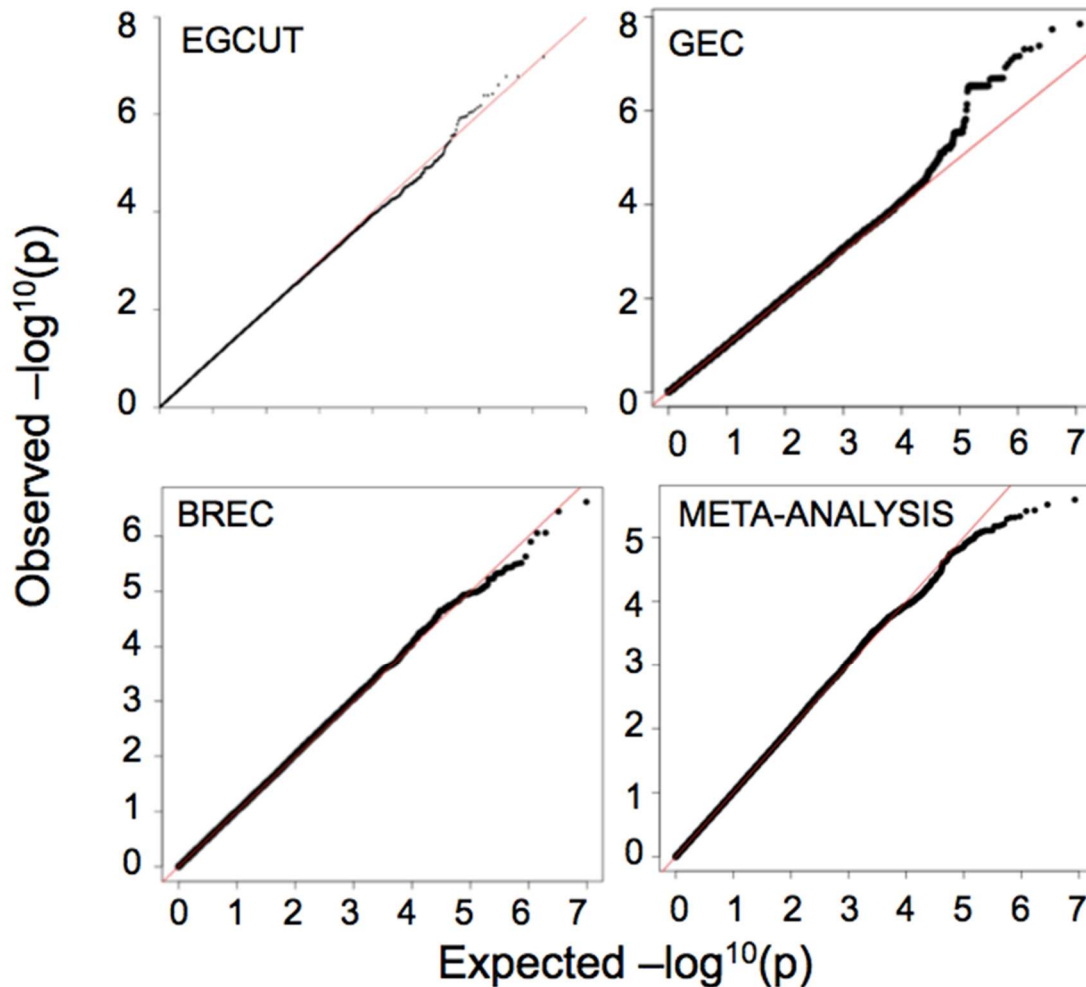

**Figure S4.** Study-specific and meta-analysis quantile-quantile plots. Quantile-quantile plots and lambda ( $\lambda$ ) values were estimated for the primary analysis using the Cochran-Armitage trend test and for the confirmatory analyzes using logistic regressions and Cochran-Mantel-Haenszel stratified tests. Expected  $P$ -values are plotted against observed  $P$ -values resulting from each single study and for the meta-analysis after genomic control correction. All cohorts showed low over-dispersion of the chi-square statistics with the following  $\lambda$ -values: EGCUT = 1.02, BREC = 1.03, and GEC = 1.00. For the overall meta-analysis, the inflation factor ( $\lambda$ ) was 0.99. If  $\lambda$  is large (for example,  $> 1.2$ ), there is evidence that the observed test statistics deviate from the expected. This could be due to true associations but is more likely due to a systematic bias (for example, population stratification effects). Filled circles indicate observed association above expected (red line).

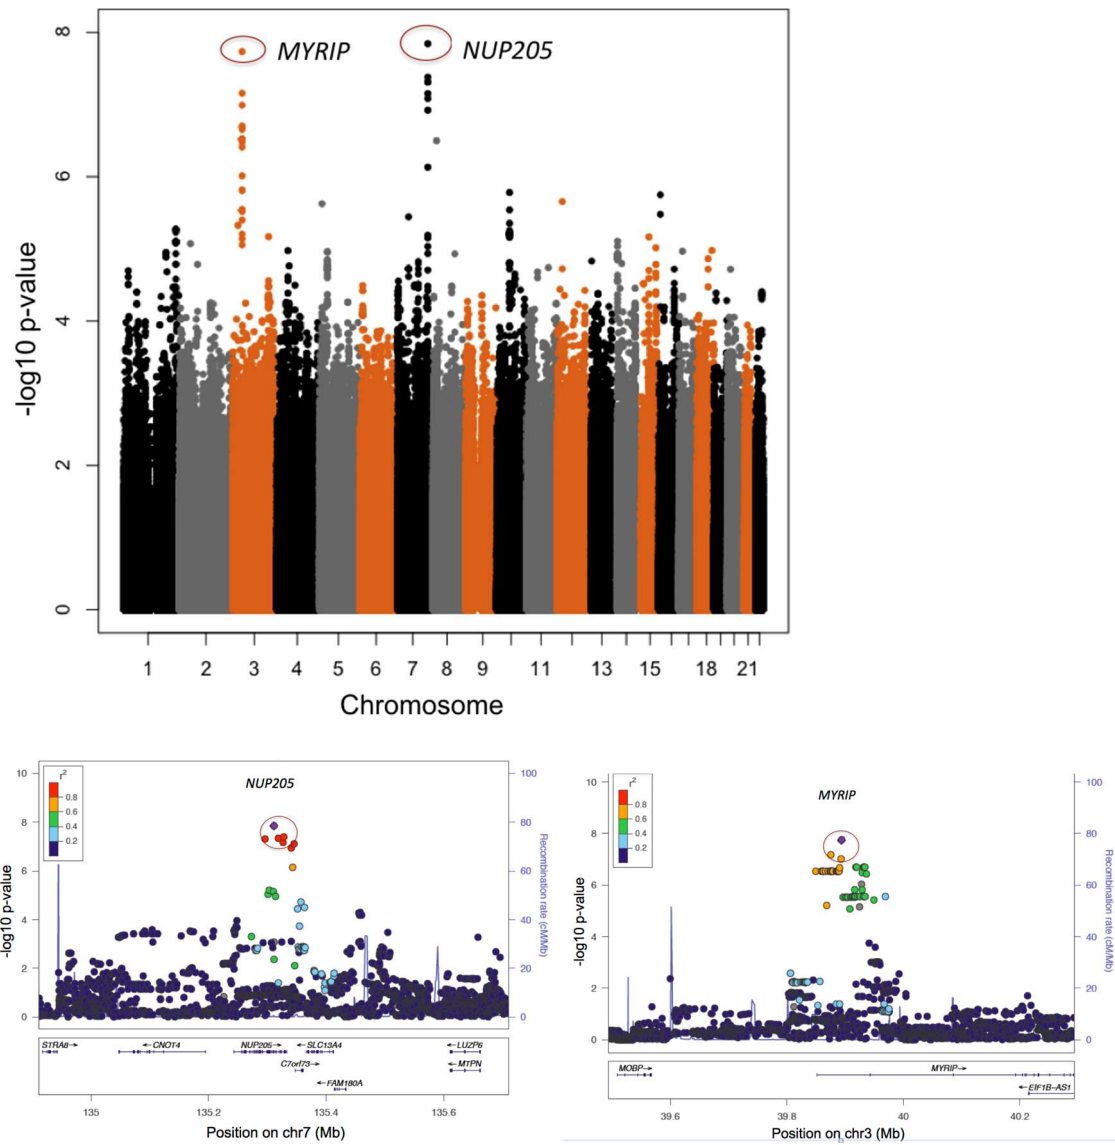

**Figure S5.** Manhattan plots of significant findings for GWAs reported for the first time in this manuscript. GEC (left upper panel) had two genome-wide significant hits (below the threshold of  $P < 5 \times 10^{-8}$ ) in chromosomes 3 and 7, while BREC and EGCUT did not yield significant results (results not shown). Genomic locations with nearby genes are shown in the bottom panels. These results did not remain significant in the final meta-analyses.

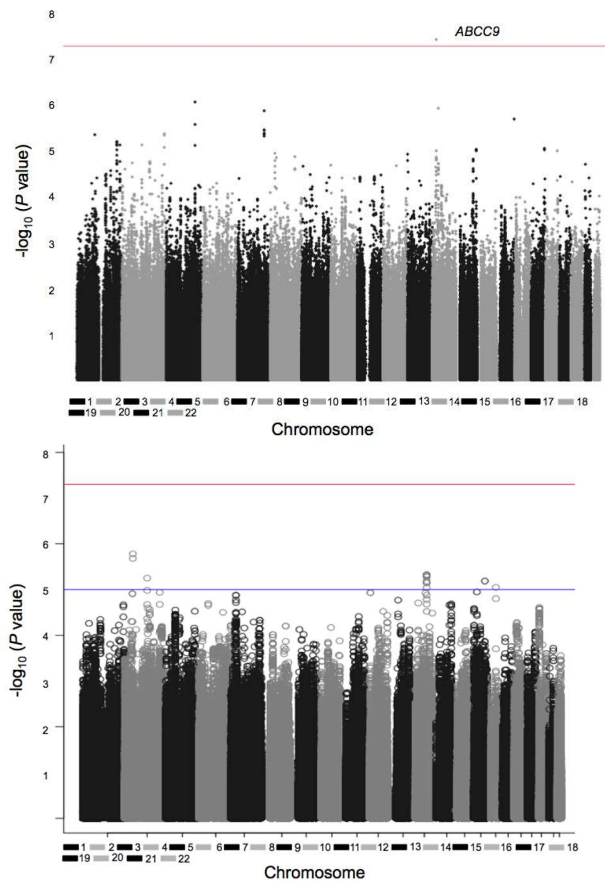

**Figure S6.** Manhattan plots of the meta-analysis results used in the pathway analysis. Left panel, meta-analyses of 7 cohorts<sup>1</sup> and, right panel, meta-analyses of 3 cohorts from GWAS data reported for the first time in this publication. SNPs are plotted on the x-axis according to their position on each chromosome against associations with sleep duration on the y-axis (shown as  $-\log_{10} P$ ). The locus associated with sleep duration (rs11046205;  $P < 5 \times 10^{-8}$ ) in our published meta-analysis is indicated (left panel). This SNP was not present in the datasets included in the current meta-analyses, which did not yield any genome-wide significant result (right panel).

a)

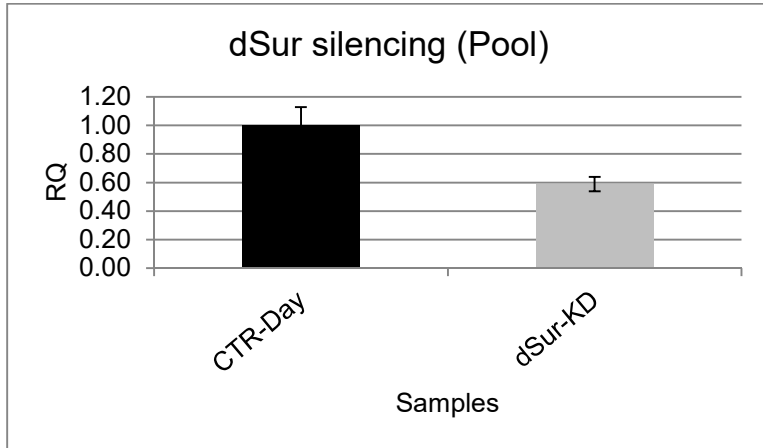

b)

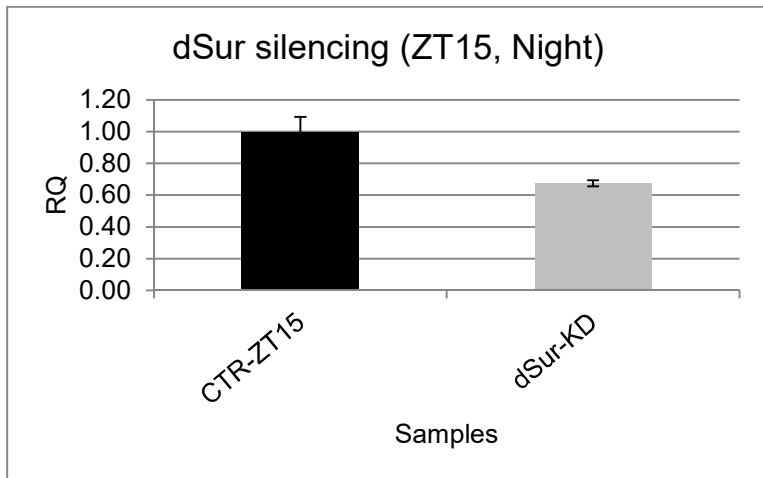

**Figure S7.** *dSur* knockdown inhibition *versus* control (CTR) shown by qRT-PCR (QR) for both (A) “Pooled” and (B) “Night” conditions. (t-Test was performed:  $p < 0.005$ ).



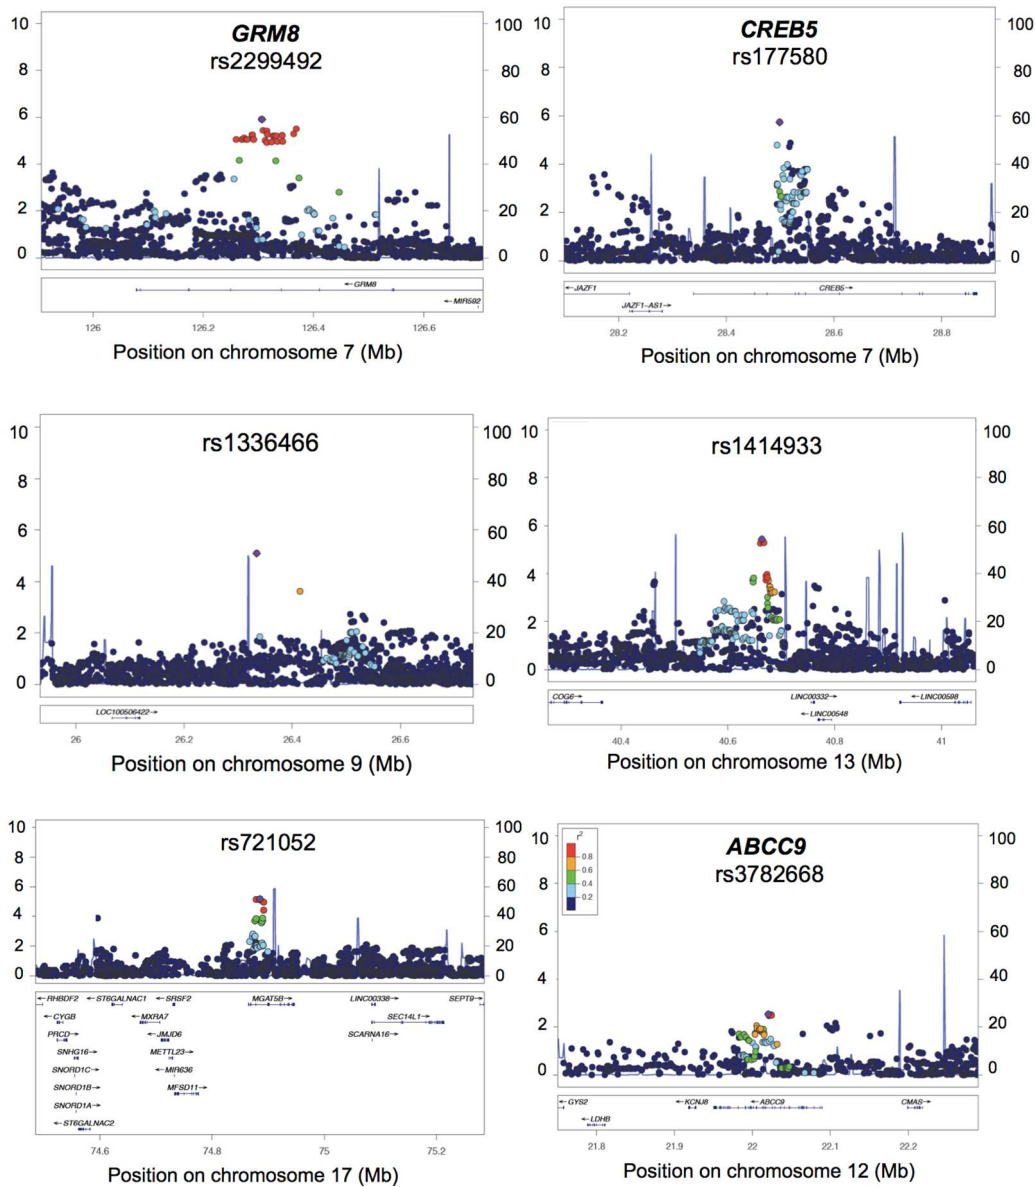

**Figure S8.** Genomic locations with nearby genes. Top 5 (top to bottom) associated genomic regions ( $P < 10^{-5}$ ) as shown in Table 1 of the manuscript. The *ABCC9* gene region (bottom right) was enriched for signals with  $P < 10^{-2}$ . The *ABCC9* variant earlier associated with sleep duration (rs11046205) was not present in the current meta-analysis results and could not be imputed because of low linkage disequilibrium with surrounding variants.

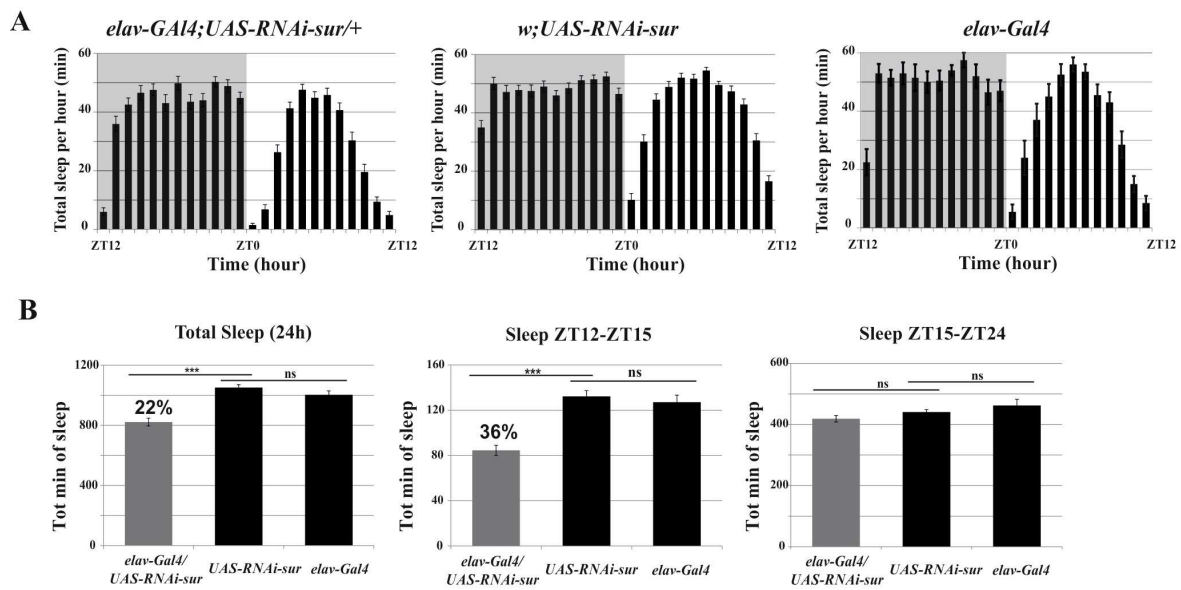

**Figure S9.** Pan-neuronal knockdown of *dSur* in *Drosophila* decreases night sleep duration. The *elav-Gal4* strain was crossed to the *UAS-Sur RNAi* line (V104241). (A) Plots of total sleep per hour (minutes) of KD and controls males in LD 12:12h light dark cycles over the 24 hours (grey background: night phase). (B) *dSur* KD flies show reduced sleep during the 24 hours day (22% of sleep reduction compared to controls) and in the first part of the night (ZT12-ZT15, 36% of reduction compared to controls). No effects on sleep amount was observed in the rest part of the night (ZT15-ZT24). (t-Test: \*\*\*  $p < 0.005$ ).

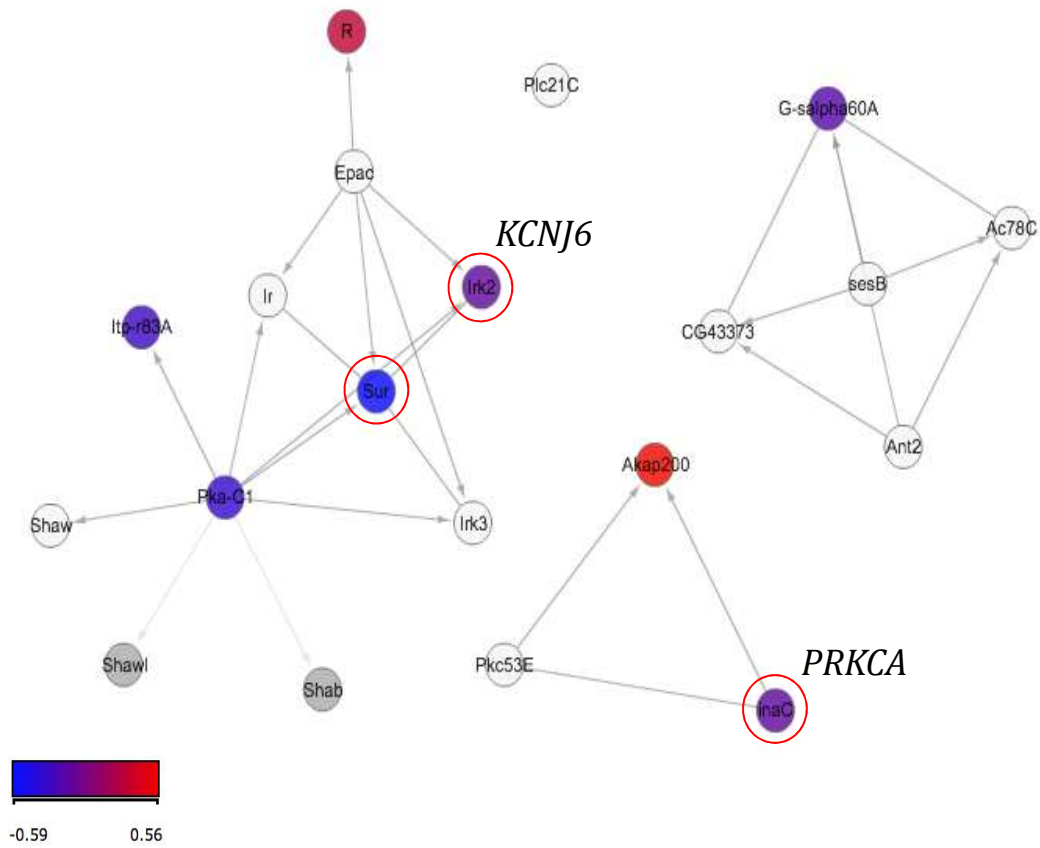

**Figure S10.** Insulin signalling pathway in *Drosophila*, with human gene homologs highlighted. This was a significant pathway (q-value < 0.05), identified with the Graphite web tool, from differentially expressed genes in the “Pooled” (q-value = 0.01) and “Night” (q-value <  $6.7 \times 10^{-5}$ ) conditions.

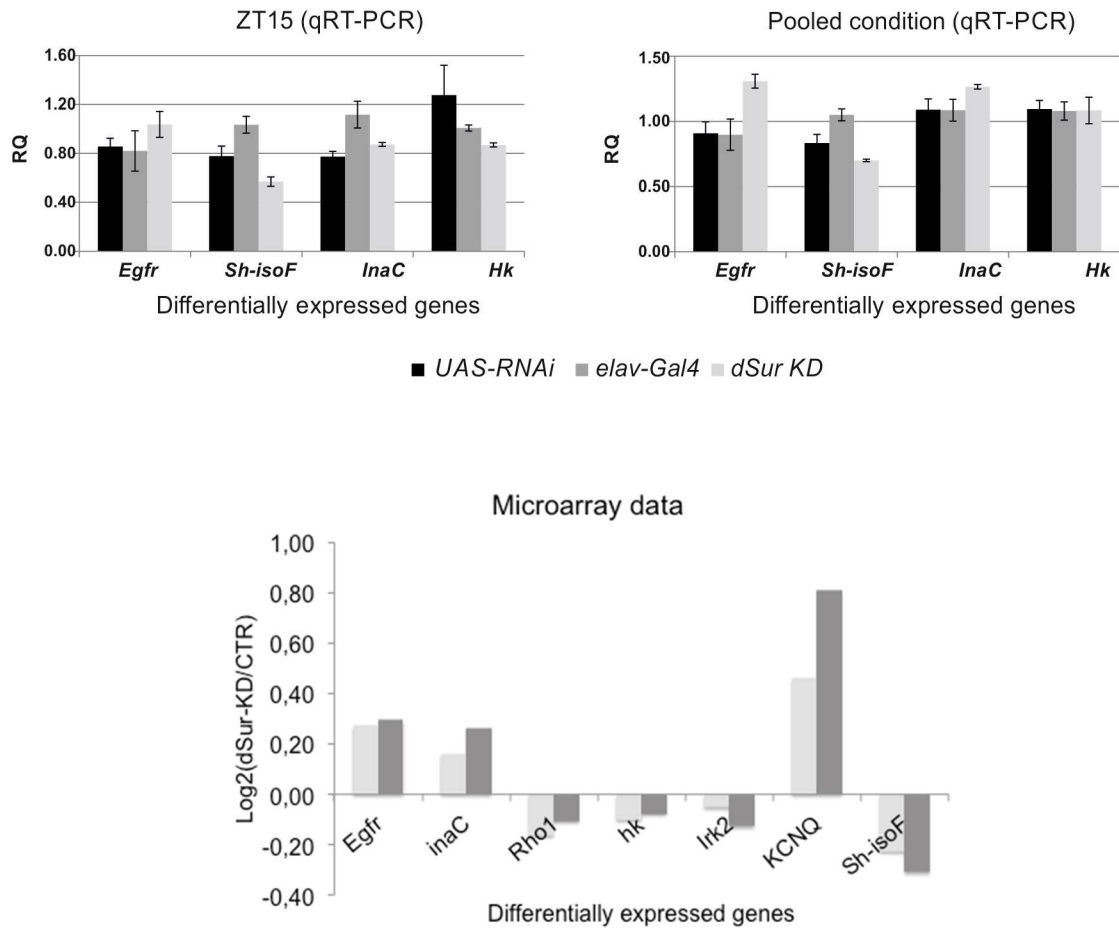

**Figure S11.** Validation of microarray expression values by qRT-PCR. (Upper panels) qRT-PCR expression levels defined in *dSur KD* vs. controls sampled in “Pooled” condition (Upper right panel) and at ZT15 “Night” condition (Upper left panel). For each condition, data are presented as the mean of relative quantity of template in the sample  $\pm$  S.D. from three different biological replicates. T-test was performed. *Sh-isoF* (ZT15): *UAS-RNAi* vs. *dSur KD*  $* < p < 0.05$  and *elav-Gal4* vs. *dSur KD*  $*** < p < 0.005$ ; *Egfr* (pooled): *UAS-RNAi* vs. *dSur KD*  $*** < p < 0.005$  and *elav-Gal4* vs. *dSur KD*  $* < p < 0.05$ . The bottom panel shows microarray expression levels defined in *dSur KD* vs. controls sampled in “Pooled” (light grey) and “Night” (dark grey) conditions. The expression level of each transcript was calculated as the  $\log_2(dSur KD / UAS-RNAi)$ .

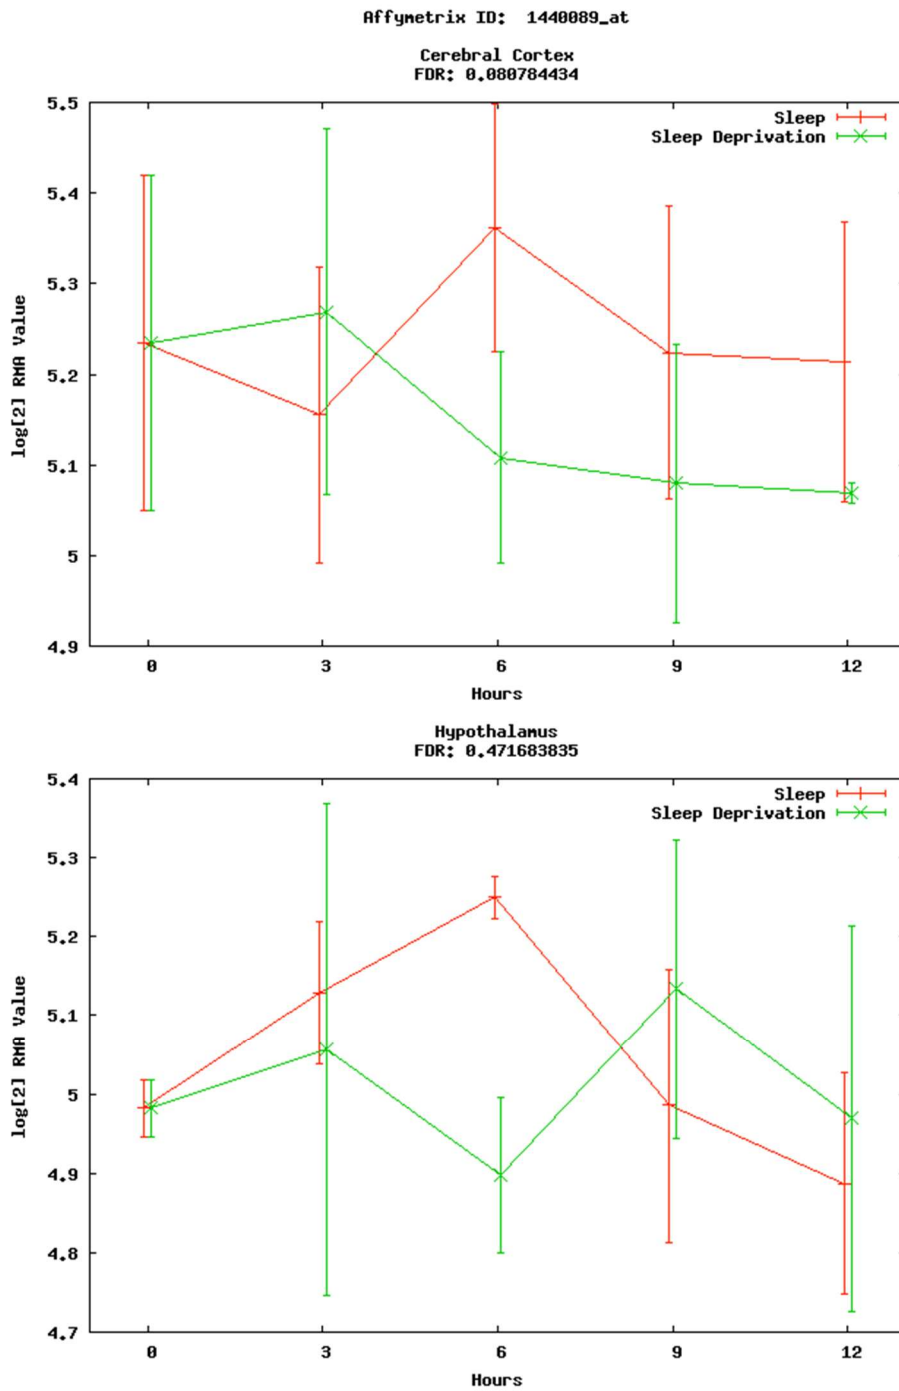

**Figure S12.** Creb5 increases during sleep and decrease during sleep deprivation in mice. Mouse Gene Expression Data. Source: Sleep Gene: <http://www.sleepgene.org/ResearchData/Mouse/Search.aspx>.

**Table S1.** Study sample characteristics. Sample size, age, BMI, and sleep duration means per gender are shown by cohort for BREC, EGCUT, GEC from the current study and EGCUT, ERF, KORA F4, KORCULA, MICROS, NESDA, ORCADES from our earlier published GWAs.<sup>1</sup>

| Data set (Ethnicity)      | Sample size                                                                         |                 | Mean age y. (range) |                | Mean BMI $\pm$ SD |                 | Mean sleep duration $\pm$ SD |                 |
|---------------------------|-------------------------------------------------------------------------------------|-----------------|---------------------|----------------|-------------------|-----------------|------------------------------|-----------------|
|                           | total                                                                               | females (males) | females             | males          | females           | males           | females                      | males           |
| <b>BREC (German)</b>      | 484                                                                                 | 334 (150)       | 43.5 (19 - 65)      | 46.7 (19 - 65) | 25.8 $\pm$ 4.9    | 26.3 $\pm$ 4.1  | 7.81 $\pm$ 1.23              | 7.78 $\pm$ 1.43 |
| <b>EGCUT (Estonian)</b>   | 750                                                                                 | 343(407)        | 39.4(18 - 70)       | 39.4 (18 - 70) | 25.8 $\pm$ 5.9    | 25.9 $\pm$ 4.5  | 7.80 $\pm$ 1.28              | 7.87 $\pm$ 1.19 |
| <b>GEC (German)</b>       | 331                                                                                 | 190 (143)       | 36.6 (18 - 70)      | 39.2 (18 - 70) | 24.7 $\pm$ 5.6    | 26.1 $\pm$ 4.8  | 7.29 $\pm$ 1.01              | 7.0 $\pm$ 0.99  |
| <b>Total</b>              | 1565                                                                                |                 |                     |                |                   |                 |                              |                 |
|                           | Cohorts included in the meta-analyses from our earlier published GWAs. <sup>1</sup> |                 |                     |                |                   |                 |                              |                 |
| <b>EGCUT (Estonian)</b>   | 924                                                                                 | 518 (406)       | 41.0 (18 - 86)      | 38.2 (18 - 82) | 25.6 $\pm$ 5.8    | 25.7 $\pm$ 4.6  | 7.92 $\pm$ 1.11              | 7.83 $\pm$ 1.14 |
| <b>ERF (Dutch)</b>        | 740                                                                                 | 397 (343)       | 46.7 (19 - 75)      | 50.0 (20 - 75) | 25.8 $\pm$ 4.69   | 27.3 $\pm$ 4.21 | 7.57 $\pm$ 1.10              | 7.26 $\pm$ 0.95 |
| <b>KORA F4 (German)</b>   | 548                                                                                 | 279 (269)       | 54.6 (40 - 65)      | 55.3 (36 - 66) | 26.6 $\pm$ 0.87   | 27.8 $\pm$ 4.21 | 7.30 $\pm$ 0.87              | 7.20 $\pm$ 0.81 |
| <b>KORCULA (Croatian)</b> | 600                                                                                 | 383 (217)       | 55.6 (18 - 75)      | 57.3 (22 - 76) | 27.8 $\pm$ 4.37   | 28.8 $\pm$ 3.56 | 7.34 $\pm$ 1.25              | 7.41 $\pm$ 1.14 |
| <b>MICROS (Italian)</b>   | 693                                                                                 | 374 (319)       | 39.3 (10 - 75)      | 41.1 (10 - 75) | 24.2 $\pm$ 4.73   | 25.6 $\pm$ 4.04 | 8.20 $\pm$ 0.83              | 7.90 $\pm$ 1.07 |
| <b>NESDA (Dutch)</b>      | 540                                                                                 | 358 (182)       | 39.8 (18 - 66)      | 44.2 (19 - 65) | 24.8 $\pm$ 5.00   | 26.0 $\pm$ 4.50 | 7.50 $\pm$ 0.90              | 7.80 $\pm$ 1.00 |
| <b>ORCADES (Scottish)</b> | 206                                                                                 | 116 (90)        | 49.8 (18 - 73)      | 50.0 (17 - 71) | 26.8 $\pm$ 5.13   | 26.7 $\pm$ 3.48 | 7.54 $\pm$ 0.88              | 7.26 $\pm$ 0.88 |
| <b>Total</b>              | 4251                                                                                |                 |                     |                |                   |                 |                              |                 |

**Table S2.** Pharmacological sleep agents. Drug groups and correspondent ATC codes used as exclusion criteria when selecting phenotyped subjects for the independent GWA studies <sup>a</sup>.

| <b>Drug groups</b>      | <b>Pharmacological ATC codes</b>         |
|-------------------------|------------------------------------------|
| Benzodiazepines         | N05CD, N05CF                             |
| Barbiturates            | N01AF, N01AG, N03AA, N05CA, N05CB, N05CX |
| Imipramine              | N06AA02, N06AA03, N06AA06                |
| Nortriptyline           | N06AA10                                  |
| Neuroleptics            | N05AK                                    |
| Phenothiazines          | N05AB, N05AC, N05AA                      |
| Fluoxetine              | N06AB03                                  |
| Sertraline              | N06AB06                                  |
| Paroxetine              | N06AB05                                  |
| β-Blockers, propranolol | C07, S01ED                               |
| Theophylline            | R03DA04                                  |
| Amphetamine             | N06B                                     |

<sup>a</sup> With exception of the NESDA cohort, that only excluded subjects using benzodiazepines

**Table S3.** Stage-1 genotyping and imputation details across the different platforms used.

| Populations | Genotyping Platform | Quality control of genotyped SNPs |        |        |      | Genetic Imputations software | NCBI Build | Analysis software | Total of SNPs for imputation | Total of SNPs in the meta-analysis | % of SNPs imput |
|-------------|---------------------|-----------------------------------|--------|--------|------|------------------------------|------------|-------------------|------------------------------|------------------------------------|-----------------|
|             |                     | HWE <i>P</i>                      | CR SNP | CR IND | MAF  |                              |            |                   |                              |                                    |                 |
| BREC        | OmniExpress 700K    | 10 <sup>-5</sup>                  | 98%    | 99%    | 0.01 | IMPUTE 2.0                   | 37         | PLINK             | 648 080                      | 4 874 049                          | 86.7            |
| EGCUT       | OmniExpress 700K    | 10 <sup>-6</sup>                  | 95%    | 95%    | 0.01 | IMPUTE 2.0                   | 37         | SNPTES            | 609 547                      | 9 249 616                          | 93.8            |
| GEC         | OmniExpress 700K    | 10 <sup>-5</sup>                  | 97%    | 99%    | 0.01 | IMPUTE 2.0                   | 37         | PLINK             | 627 822                      | 6 055 183                          | 89.6            |

All individual association studies results underwent genomic control before meta-analysis. Cohorts were comprised of unrelated individuals. CR: call rate; MAF: minor allele frequency.



**Table S4.** List of best 100 associations with  $SD_{av}$  in our new meta-analyses. The file included Chromosome, genomic position, SNP rs codes, alleles, number of studies included in the meta-analysis, *P*-values and effect (beta).

| CHR       | Genomic Position | SNP                | A1       | A2       | N        | P                | P.R.             | Beta           |
|-----------|------------------|--------------------|----------|----------|----------|------------------|------------------|----------------|
| <u>13</u> | <u>42278410</u>  | <u>rs28583896</u>  | <u>C</u> | <u>T</u> | <u>2</u> | <u>1.227e-06</u> | <u>1.227e-06</u> | <u>-0.8936</u> |
| <u>7</u>  | <u>126305306</u> | <u>rs116998487</u> | <u>C</u> | <u>A</u> | <u>3</u> | <u>1.232e-06</u> | <u>1.232e-06</u> | <u>0.3571</u>  |
| <u>7</u>  | <u>126306495</u> | <u>rs2299492</u>   | <u>C</u> | <u>T</u> | <u>3</u> | <u>1.232e-06</u> | <u>1.232e-06</u> | <u>0.3571</u>  |
| <u>7</u>  | <u>28498869</u>  | <u>rs177583</u>    | <u>C</u> | <u>T</u> | <u>2</u> | <u>1.838e-06</u> | <u>1.838e-06</u> | <u>-0.2224</u> |
| <u>7</u>  | <u>28498670</u>  | <u>rs177580</u>    | <u>C</u> | <u>T</u> | <u>2</u> | <u>1.852e-06</u> | <u>1.852e-06</u> | <u>-0.2224</u> |
| <u>1</u>  | <u>164547894</u> | <u>rs56217471</u>  | <u>C</u> | <u>G</u> | <u>3</u> | <u>1.877e-06</u> | <u>1.877e-06</u> | <u>-0.5955</u> |
| <u>7</u>  | <u>126369228</u> | <u>rs2237765</u>   | <u>G</u> | <u>C</u> | <u>3</u> | <u>3.113e-06</u> | <u>3.113e-06</u> | <u>0.3443</u>  |
| <u>7</u>  | <u>126308312</u> | <u>rs13243112</u>  | <u>A</u> | <u>C</u> | <u>3</u> | <u>3.65e-06</u>  | <u>3.65e-06</u>  | <u>0.3373</u>  |
| <u>13</u> | <u>40663593</u>  | <u>rs1414933</u>   | <u>G</u> | <u>A</u> | <u>3</u> | <u>3.719e-06</u> | <u>3.719e-06</u> | <u>0.2519</u>  |
| <u>7</u>  | <u>126315771</u> | <u>rs4731321</u>   | <u>A</u> | <u>G</u> | <u>3</u> | <u>3.848e-06</u> | <u>3.848e-06</u> | <u>0.3427</u>  |
| <u>2</u>  | <u>196073314</u> | <u>rs12614225</u>  | <u>G</u> | <u>A</u> | <u>2</u> | <u>4.585e-06</u> | <u>4.585e-06</u> | <u>0.6756</u>  |
| <u>6</u>  | <u>134093851</u> | <u>rs148960800</u> | <u>T</u> | <u>C</u> | <u>3</u> | <u>4.651e-06</u> | <u>4.651e-06</u> | <u>0.5168</u>  |
| <u>13</u> | <u>40666492</u>  | <u>rs7985465</u>   | <u>G</u> | <u>C</u> | <u>3</u> | <u>5.073e-06</u> | <u>5.073e-06</u> | <u>0.2485</u>  |
| <u>4</u>  | <u>183014867</u> | <u>rs79698313</u>  | <u>G</u> | <u>A</u> | <u>3</u> | <u>5.123e-06</u> | <u>0.03504</u>   | <u>0.2257</u>  |
| <u>13</u> | <u>40667486</u>  | <u>rs2027203</u>   | <u>T</u> | <u>C</u> | <u>3</u> | <u>5.283e-06</u> | <u>5.283e-06</u> | <u>0.2478</u>  |
| <u>7</u>  | <u>126364317</u> | <u>rs2237764</u>   | <u>C</u> | <u>T</u> | <u>3</u> | <u>5.321e-06</u> | <u>5.321e-06</u> | <u>0.3386</u>  |
| <u>10</u> | <u>105398890</u> | <u>rs148103957</u> | <u>C</u> | <u>A</u> | <u>2</u> | <u>5.375e-06</u> | <u>5.375e-06</u> | <u>0.9377</u>  |
| <u>7</u>  | <u>126316657</u> | <u>rs1815973</u>   | <u>G</u> | <u>A</u> | <u>3</u> | <u>5.495e-06</u> | <u>5.495e-06</u> | <u>0.3371</u>  |
| <u>13</u> | <u>40661167</u>  | <u>rs9566494</u>   | <u>G</u> | <u>A</u> | <u>3</u> | <u>5.534e-06</u> | <u>5.534e-06</u> | <u>0.2478</u>  |
| <u>8</u>  | <u>68285247</u>  | <u>rs11780094</u>  | <u>G</u> | <u>A</u> | <u>2</u> | <u>5.727e-06</u> | <u>5.727e-06</u> | <u>-0.2295</u> |
| <u>7</u>  | <u>126288627</u> | <u>rs34055791</u>  | <u>T</u> | <u>A</u> | <u>3</u> | <u>5.868e-06</u> | <u>5.868e-06</u> | <u>0.3409</u>  |
| <u>7</u>  | <u>126289582</u> | <u>rs2078808</u>   | <u>A</u> | <u>C</u> | <u>3</u> | <u>5.868e-06</u> | <u>5.868e-06</u> | <u>0.3409</u>  |
| <u>12</u> | <u>113485169</u> | <u>rs73205270</u>  | <u>G</u> | <u>A</u> | <u>3</u> | <u>6.054e-06</u> | <u>0.01514</u>   | <u>-0.2055</u> |
| <u>7</u>  | <u>126343361</u> | <u>rs2283068</u>   | <u>G</u> | <u>A</u> | <u>3</u> | <u>6.106e-06</u> | <u>6.106e-06</u> | <u>0.3363</u>  |

|           |                  |                         |              |           |          |                  |                  |                |
|-----------|------------------|-------------------------|--------------|-----------|----------|------------------|------------------|----------------|
| <u>7</u>  | <u>126343421</u> | <u>rs2283069</u>        | <u>G</u>     | <u>T</u>  | <u>3</u> | <u>6.106e-06</u> | <u>6.106e-06</u> | <u>0.3363</u>  |
| <u>3</u>  | <u>30618532</u>  | <u>rs141391123</u>      | <u>C</u>     | <u>T</u>  | <u>3</u> | <u>6.308e-06</u> | <u>6.308e-06</u> | <u>-0.6967</u> |
| <u>7</u>  | <u>126326353</u> | <u>rs12667118</u>       | <u>G</u>     | <u>A</u>  | <u>3</u> | <u>6.337e-06</u> | <u>6.337e-06</u> | <u>0.3357</u>  |
| <u>7</u>  | <u>126332301</u> | <u>rs3808153</u>        | <u>T</u>     | <u>A</u>  | <u>3</u> | <u>6.387e-06</u> | <u>6.387e-06</u> | <u>0.3356</u>  |
| <u>7</u>  | <u>126329963</u> | <u>rs1008905</u>        | <u>C</u>     | <u>T</u>  | <u>3</u> | <u>6.409e-06</u> | <u>6.409e-06</u> | <u>0.3355</u>  |
| <u>12</u> | <u>113489545</u> | <u>rs55798985</u>       | <u>G</u>     | <u>A</u>  | <u>3</u> | <u>6.509e-06</u> | <u>0.004619</u>  | <u>-0.2051</u> |
| <u>4</u>  | <u>170684647</u> | <u>chr4:170684647:D</u> | <u>GACTA</u> | <u>G</u>  | <u>2</u> | <u>6.738e-06</u> | <u>6.738e-06</u> | <u>0.2156</u>  |
| <u>3</u>  | <u>30631726</u>  | <u>rs186908119</u>      | <u>C</u>     | <u>T</u>  | <u>3</u> | <u>6.85e-06</u>  | <u>6.85e-06</u>  | <u>-0.6883</u> |
| <u>17</u> | <u>74885031</u>  | <u>rs7210252</u>        | <u>G</u>     | <u>T</u>  | <u>3</u> | <u>7.076e-06</u> | <u>0.007705</u>  | <u>0.3256</u>  |
| <u>17</u> | <u>74885049</u>  | <u>rs7211485</u>        | <u>C</u>     | <u>T</u>  | <u>3</u> | <u>7.076e-06</u> | <u>0.007705</u>  | <u>0.3256</u>  |
| <u>17</u> | <u>74885176</u>  | <u>rs7212262</u>        | <u>A</u>     | <u>G</u>  | <u>3</u> | <u>7.09e-06</u>  | <u>0.00773</u>   | <u>0.3256</u>  |
| <u>17</u> | <u>74878823</u>  | <u>rs76943265</u>       | <u>G</u>     | <u>A</u>  | <u>3</u> | <u>7.141e-06</u> | <u>0.007274</u>  | <u>0.3266</u>  |
| <u>17</u> | <u>74885595</u>  | <u>rs7216131</u>        | <u>C</u>     | <u>T</u>  | <u>3</u> | <u>7.147e-06</u> | <u>0.007851</u>  | <u>0.3252</u>  |
| <u>3</u>  | <u>30647406</u>  | <u>rs11466480</u>       | <u>T</u>     | <u>G</u>  | <u>3</u> | <u>7.231e-06</u> | <u>7.231e-06</u> | <u>-0.6836</u> |
| <u>17</u> | <u>74885948</u>  | <u>rs7216800</u>        | <u>C</u>     | <u>T</u>  | <u>3</u> | <u>7.85e-06</u>  | <u>0.008948</u>  | <u>0.3235</u>  |
| <u>7</u>  | <u>126273998</u> | <u>rs13241983</u>       | <u>T</u>     | <u>C</u>  | <u>3</u> | <u>7.857e-06</u> | <u>7.857e-06</u> | <u>0.3378</u>  |
| <u>8</u>  | <u>97647128</u>  | <u>rs4734348</u>        | <u>T</u>     | <u>A</u>  | <u>3</u> | <u>8.051e-06</u> | <u>0.03553</u>   | <u>0.6493</u>  |
| <u>9</u>  | <u>26333942</u>  | <u>rs1336466</u>        | <u>T</u>     | <u>C</u>  | <u>2</u> | <u>8.123e-06</u> | <u>8.123e-06</u> | <u>-0.2649</u> |
| <u>3</u>  | <u>95905630</u>  | <u>chr3:95905630:D</u>  | <u>TCTAA</u> | <u>T</u>  | <u>2</u> | <u>8.661e-06</u> | <u>0.0001184</u> | <u>0.1793</u>  |
| <u>15</u> | <u>100982234</u> | <u>rs2654593</u>        | <u>G</u>     | <u>A</u>  | <u>2</u> | <u>8.861e-06</u> | <u>8.861e-06</u> | <u>0.2096</u>  |
| <u>7</u>  | <u>126270159</u> | <u>rs1419483</u>        | <u>A</u>     | <u>C</u>  | <u>3</u> | <u>8.975e-06</u> | <u>8.975e-06</u> | <u>0.3353</u>  |
| <u>7</u>  | <u>126279831</u> | <u>rs35248039</u>       | <u>A</u>     | <u>C</u>  | <u>3</u> | <u>8.975e-06</u> | <u>8.975e-06</u> | <u>0.3353</u>  |
| <u>7</u>  | <u>126260009</u> | <u>rs4728046</u>        | <u>T</u>     | <u>C</u>  | <u>3</u> | <u>8.977e-06</u> | <u>8.977e-06</u> | <u>0.3353</u>  |
| <u>7</u>  | <u>126291048</u> | <u>rs77263654</u>       | <u>C</u>     | <u>A</u>  | <u>3</u> | <u>9.005e-06</u> | <u>9.005e-06</u> | <u>0.3351</u>  |
| <u>7</u>  | <u>126291876</u> | <u>rs12706739</u>       | <u>G</u>     | <u>A</u>  | <u>3</u> | <u>9.005e-06</u> | <u>9.005e-06</u> | <u>0.3351</u>  |
| <u>7</u>  | <u>126269978</u> | <u>rs1419482</u>        | <u>T</u>     | <u>C</u>  | <u>3</u> | <u>9.136e-06</u> | <u>9.136e-06</u> | <u>0.3352</u>  |
| <u>7</u>  | <u>126278466</u> | <u>rs3808158</u>        | <u>G</u>     | <u>T</u>  | <u>3</u> | <u>9.136e-06</u> | <u>9.136e-06</u> | <u>0.3352</u>  |
| <u>3</u>  | <u>95893870</u>  | <u>chr3:95893870:I</u>  | <u>C</u>     | <u>CA</u> | <u>2</u> | <u>9.586e-06</u> | <u>9.144e-05</u> | <u>0.1788</u>  |
| <u>15</u> | <u>57594556</u>  | <u>rs10152152</u>       | <u>A</u>     | <u>G</u>  | <u>2</u> | <u>9.933e-06</u> | <u>0.04066</u>   | <u>-0.3901</u> |

|           |                  |                         |            |          |          |                  |                  |                |
|-----------|------------------|-------------------------|------------|----------|----------|------------------|------------------|----------------|
| <u>1</u>  | <u>157553577</u> | <u>rs75638380</u>       | <u>C</u>   | <u>T</u> | <u>2</u> | <u>9.948e-06</u> | <u>5.014e-05</u> | <u>-0.6264</u> |
| <u>2</u>  | <u>196095297</u> | <u>rs138696578</u>      | <u>A</u>   | <u>C</u> | <u>2</u> | <u>9.982e-06</u> | <u>0.002369</u>  | <u>-0.5985</u> |
| <u>7</u>  | <u>135342916</u> | <u>rs10279223</u>       | <u>G</u>   | <u>T</u> | <u>2</u> | <u>9.997e-06</u> | <u>0.09644</u>   | <u>0.2193</u>  |
| <u>7</u>  | <u>126312223</u> | <u>rs1579214</u>        | <u>G</u>   | <u>A</u> | <u>3</u> | <u>1.012e-05</u> | <u>1.012e-05</u> | <u>0.3163</u>  |
| <u>7</u>  | <u>126343862</u> | <u>rs35009695</u>       | <u>A</u>   | <u>G</u> | <u>3</u> | <u>1.083e-05</u> | <u>1.083e-05</u> | <u>0.3231</u>  |
| <u>17</u> | <u>74891573</u>  | <u>rs7218860</u>        | <u>G</u>   | <u>A</u> | <u>3</u> | <u>1.09e-05</u>  | <u>0.01012</u>   | <u>0.3264</u>  |
| <u>4</u>  | <u>170701875</u> | <u>rs2133954</u>        | <u>A</u>   | <u>G</u> | <u>3</u> | <u>1.118e-05</u> | <u>0.002088</u>  | <u>0.1864</u>  |
| <u>7</u>  | <u>126334725</u> | <u>rs3808152</u>        | <u>G</u>   | <u>A</u> | <u>3</u> | <u>1.129e-05</u> | <u>1.129e-05</u> | <u>0.3224</u>  |
| <u>7</u>  | <u>126324176</u> | <u>rs10279616</u>       | <u>G</u>   | <u>T</u> | <u>3</u> | <u>1.134e-05</u> | <u>1.134e-05</u> | <u>0.3222</u>  |
| <u>4</u>  | <u>170706770</u> | <u>rs4692751</u>        | <u>G</u>   | <u>A</u> | <u>3</u> | <u>1.185e-05</u> | <u>0.000725</u>  | <u>0.1821</u>  |
| <u>14</u> | <u>90740803</u>  | <u>rs73316773</u>       | <u>A</u>   | <u>C</u> | <u>3</u> | <u>1.217e-05</u> | <u>1.217e-05</u> | <u>-0.2643</u> |
| <u>7</u>  | <u>126315112</u> | <u>rs2896374</u>        | <u>C</u>   | <u>A</u> | <u>3</u> | <u>1.225e-05</u> | <u>1.225e-05</u> | <u>0.3187</u>  |
| <u>4</u>  | <u>170706947</u> | <u>rs12650742</u>       | <u>G</u>   | <u>A</u> | <u>3</u> | <u>1.245e-05</u> | <u>0.0007975</u> | <u>0.1817</u>  |
| <u>4</u>  | <u>170706960</u> | <u>rs12644857</u>       | <u>C</u>   | <u>A</u> | <u>3</u> | <u>1.245e-05</u> | <u>0.0007975</u> | <u>0.1817</u>  |
| <u>12</u> | <u>113489410</u> | <u>rs11612707</u>       | <u>C</u>   | <u>T</u> | <u>3</u> | <u>1.26e-05</u>  | <u>0.003933</u>  | <u>-0.1987</u> |
| <u>3</u>  | <u>78107128</u>  | <u>rs2872373</u>        | <u>C</u>   | <u>A</u> | <u>3</u> | <u>1.267e-05</u> | <u>1.267e-05</u> | <u>-0.1655</u> |
| <u>14</u> | <u>90758305</u>  | <u>rs73318621</u>       | <u>G</u>   | <u>A</u> | <u>3</u> | <u>1.292e-05</u> | <u>1.292e-05</u> | <u>-0.2639</u> |
| <u>20</u> | <u>49339595</u>  | <u>rs231584</u>         | <u>C</u>   | <u>T</u> | <u>2</u> | <u>1.298e-05</u> | <u>1.298e-05</u> | <u>-0.5176</u> |
| <u>3</u>  | <u>77344784</u>  | <u>rs9848444</u>        | <u>C</u>   | <u>T</u> | <u>3</u> | <u>1.312e-05</u> | <u>1.312e-05</u> | <u>-0.2486</u> |
| <u>5</u>  | <u>34867</u>     | <u>rs4956952</u>        | <u>G</u>   | <u>A</u> | <u>2</u> | <u>1.326e-05</u> | <u>1.326e-05</u> | <u>0.2285</u>  |
| <u>7</u>  | <u>28518799</u>  | <u>rs217511</u>         | <u>C</u>   | <u>T</u> | <u>2</u> | <u>1.341e-05</u> | <u>1.341e-05</u> | <u>0.207</u>   |
| <u>8</u>  | <u>55385525</u>  | <u>rs112233799</u>      | <u>C</u>   | <u>T</u> | <u>2</u> | <u>1.354e-05</u> | <u>0.0001959</u> | <u>-0.5614</u> |
| <u>6</u>  | <u>33090305</u>  | <u>rs115793178</u>      | <u>G</u>   | <u>A</u> | <u>2</u> | <u>1.385e-05</u> | <u>1.385e-05</u> | <u>-0.2176</u> |
| <u>12</u> | <u>113485599</u> | <u>rs11614358</u>       | <u>G</u>   | <u>A</u> | <u>3</u> | <u>1.4e-05</u>   | <u>0.008084</u>  | <u>-0.1966</u> |
| <u>18</u> | <u>25653386</u>  | <u>chr18:25653386:D</u> | <u>TG</u>  | <u>T</u> | <u>2</u> | <u>1.402e-05</u> | <u>0.0001311</u> | <u>-0.492</u>  |
| <u>15</u> | <u>57599707</u>  | <u>rs72736018</u>       | <u>C</u>   | <u>A</u> | <u>2</u> | <u>1.426e-05</u> | <u>0.0139</u>    | <u>-0.4388</u> |
| <u>18</u> | <u>25637621</u>  | <u>chr18:25637621:D</u> | <u>ACT</u> | <u>A</u> | <u>2</u> | <u>1.456e-05</u> | <u>1.456e-05</u> | <u>-0.5824</u> |
| <u>10</u> | <u>6176166</u>   | <u>rs4747886</u>        | <u>C</u>   | <u>T</u> | <u>2</u> | <u>1.492e-05</u> | <u>1.492e-05</u> | <u>-0.2112</u> |
| <u>6</u>  | <u>33090336</u>  | <u>rs116242773</u>      | <u>G</u>   | <u>A</u> | <u>2</u> | <u>1.511e-05</u> | <u>1.511e-05</u> | <u>-0.2159</u> |

|           |                  |                    |          |          |          |                  |                  |                |
|-----------|------------------|--------------------|----------|----------|----------|------------------|------------------|----------------|
| <u>12</u> | <u>85068498</u>  | <u>rs75873422</u>  | <u>G</u> | <u>T</u> | <u>3</u> | <u>1.521e-05</u> | <u>1.521e-05</u> | <u>-0.33</u>   |
| <u>12</u> | <u>85068731</u>  | <u>rs111667343</u> | <u>C</u> | <u>T</u> | <u>3</u> | <u>1.521e-05</u> | <u>1.521e-05</u> | <u>-0.33</u>   |
| <u>8</u>  | <u>131651727</u> | <u>rs13255815</u>  | <u>T</u> | <u>C</u> | <u>3</u> | <u>1.575e-05</u> | <u>2.381e-05</u> | <u>-0.1627</u> |
| <u>11</u> | <u>86919145</u>  | <u>rs301592</u>    | <u>G</u> | <u>T</u> | <u>3</u> | <u>1.584e-05</u> | <u>1.584e-05</u> | <u>-0.3597</u> |
| <u>20</u> | <u>49338809</u>  | <u>rs190161</u>    | <u>G</u> | <u>A</u> | <u>2</u> | <u>1.629e-05</u> | <u>1.629e-05</u> | <u>-0.5153</u> |
| <u>20</u> | <u>49338233</u>  | <u>rs846747</u>    | <u>C</u> | <u>T</u> | <u>2</u> | <u>1.655e-05</u> | <u>1.655e-05</u> | <u>-0.5152</u> |
| <u>7</u>  | <u>28493761</u>  | <u>rs76194790</u>  | <u>C</u> | <u>T</u> | <u>2</u> | <u>1.673e-05</u> | <u>1.673e-05</u> | <u>0.2291</u>  |
| <u>20</u> | <u>49337952</u>  | <u>rs846746</u>    | <u>T</u> | <u>C</u> | <u>2</u> | <u>1.696e-05</u> | <u>1.696e-05</u> | <u>-0.5145</u> |
| <u>11</u> | <u>86916076</u>  | <u>rs540188</u>    | <u>G</u> | <u>A</u> | <u>3</u> | <u>1.744e-05</u> | <u>1.744e-05</u> | <u>-0.3575</u> |
| <u>16</u> | <u>87493201</u>  | <u>rs11641226</u>  | <u>C</u> | <u>T</u> | <u>2</u> | <u>1.76e-05</u>  | <u>0.03322</u>   | <u>0.2697</u>  |
| <u>20</u> | <u>49336632</u>  | <u>rs405926</u>    | <u>A</u> | <u>C</u> | <u>2</u> | <u>1.779e-05</u> | <u>1.779e-05</u> | <u>-0.5135</u> |
| <u>4</u>  | <u>170698024</u> | <u>rs6553458</u>   | <u>C</u> | <u>T</u> | <u>3</u> | <u>1.783e-05</u> | <u>0.001965</u>  | <u>0.1915</u>  |
| <u>4</u>  | <u>170707495</u> | <u>rs62344460</u>  | <u>T</u> | <u>C</u> | <u>3</u> | <u>1.831e-05</u> | <u>0.0005349</u> | <u>0.1863</u>  |
| <u>19</u> | <u>52398105</u>  | <u>rs11879492</u>  | <u>T</u> | <u>A</u> | <u>2</u> | <u>1.836e-05</u> | <u>1.836e-05</u> | <u>0.5953</u>  |
| <u>5</u>  | <u>10701251</u>  | <u>rs2918395</u>   | <u>A</u> | <u>G</u> | <u>2</u> | <u>1.843e-05</u> | <u>0.01161</u>   | <u>-0.247</u>  |
| <u>4</u>  | <u>170709315</u> | <u>rs6828442</u>   | <u>A</u> | <u>C</u> | <u>3</u> | <u>1.857e-05</u> | <u>0.0004998</u> | <u>0.1862</u>  |
| <u>4</u>  | <u>183010367</u> | <u>rs9312286</u>   | <u>T</u> | <u>C</u> | <u>3</u> | <u>1.86e-05</u>  | <u>0.03302</u>   | <u>0.2121</u>  |
| <u>4</u>  | <u>170708294</u> | <u>rs28769080</u>  | <u>A</u> | <u>G</u> | <u>3</u> | <u>1.899e-05</u> | <u>0.0004763</u> | <u>0.186</u>   |

**Table S5.** List of all significant pathways (q-value < 0.05) identified with Graphite web tool from 2885 differentially expressed genes in “Night” condition. To be downloaded as a separate excel file.

**Table S6.** List of all significant pathways (q-value < 0.05) identified with Graphite web tool from 4941 differentially expressed genes in “Pooled” condition. To be downloaded as a separate excel file.

**Table S7.** List of differentially expressed genes in *dSur* KD vs. control flies detected by LIMMA analysis (FDR < 5%) in the “Pooled” (4941) and “Night” (2885) conditions. The expression level of each transcript was calculated as the  $\text{Log}_2(\text{dSur KD/wt})$ . To be downloaded as a separate excel file.

**Table S8.** List of the interactions with literature references supporting the interaction network given in Fig. 1.

| <b>Subject</b>            | <b>Relation type</b>  | <b>Object</b>                                 | <b>PubMed ID</b> | <b>CIDeR ID</b> |
|---------------------------|-----------------------|-----------------------------------------------|------------------|-----------------|
| ABCC8<br>(polymorphism)   | decreases activity of | hyperglycemia                                 | 18599530         | 24219           |
| ABCC8 (mutation)          | increases activity of | Hyperinsulinemic<br>hypoglycemia, familial, 1 | 21968738         | 24300           |
| ABCC8<br>(polymorphism)   | increases activity of | Diabetes mellitus, type II                    | 21968738         | 24312           |
| ABCC8<br>(polymorphism)   | decreases activity of | insulin secretion                             | 17259403         | 24318           |
| ABCC9 (mutation)          | affects activity of   | Cardiomyopathy, dilated                       | 15034580         | 45160           |
| ABCC9 (mutation)          | affects activity of   | heart failure                                 | 15034580         | 45157           |
| ABCC9<br>(polymorphism)   | affects activity of   | sleep duration                                | 22105623         | 45162           |
| ABL1                      | affects activity of   | insulin receptor signaling<br>pathway         | 19251035         | 45130           |
| ACCN1                     | affects activity of   | hypertension                                  | 20064394         | 45052           |
| AP3S1<br>(polymorphism)   | increases activity of | Diabetes mellitus, type II                    | 20512086         | 52055           |
| AQP9                      | affects activity of   | glycerol transport                            | 25008241         | 52410           |
| ATXN1                     | affects expression of | glucose homeostasis                           | 27466200         | 73862           |
| CACNA1A<br>(mutation)     | affects activity of   | Diabetes mellitus, type II                    | 9702684          | 52418           |
| CACNA1C                   | affects activity of   | insulin secretion                             | 18562674         | 52424           |
| CACNA1E<br>(polymorphism) | decreases activity of | insulin secretion                             | 17934712         | 52426           |
| CACNA1E<br>(polymorphism) | increases activity of | Diabetes mellitus, type II                    | 17934712         | 52425           |

|                               |                                 |                                       |          |       |
|-------------------------------|---------------------------------|---------------------------------------|----------|-------|
| CACNA2D1<br>(mutation)        | affects activity of             | QT syndrome, short                    | 21383000 | 45062 |
| CACNA2D1<br>(polymorphism)    | affects activity of             | Brugada syndrome                      | 23414114 | 45061 |
| CAMK2G                        | affects activity of             | insulin secretion                     | 24627477 | 52100 |
| CAMK2G                        | increases<br>phosphorylation of | RYR2                                  | 23516528 | 52427 |
| CBLB                          | affects activity of             | Diabetes mellitus, type I             | 18201552 | 73756 |
| CBLB (mutation)               | affects activity of             | insulin receptor signaling<br>pathway | 23349502 | 45562 |
| circadian rhythm              | affects expression of           | CACNA2D1                              | 18156197 | 45059 |
| circadian rhythm              | affects expression of           | RYR2                                  | 19776257 | 43181 |
| CLOCK                         | affects activity of             | circadian rhythm                      | 20591414 | 43220 |
| Diabetes mellitus,<br>type II | increases expression of         | TRPC4                                 | 19393642 | 45587 |
| Diabetes mellitus,<br>type II | decreases quantity of           | SLC22A8                               | 24801871 | 52419 |
| Diabetes mellitus,<br>type II | increases expression of         | CACNA2D1                              | 21216827 | 45063 |
| Diabetes mellitus,<br>type II | increases expression of         | FBP1                                  | 20567778 | 40913 |
| Diabetes mellitus,<br>type I  | affects expression of           | ACCN1                                 | 23723009 | 45050 |
| EGFR                          | affects activity of             | ERBB signaling pathway                | 9247128  | 46009 |
| EGFR                          | increases quantity of           | sleep duration                        | 17694052 | 46002 |
| EGFR                          | interacts with                  | ABL1                                  | 16273093 | 45092 |
| EGFR                          | interacts with                  | ERBB 4                                | 10572067 | 45095 |
| FBP1                          | affects activity of             | gluconeogenesis                       | 20567778 | 40916 |
| FBP1                          | affects activity of             | insulin secretion                     | 20719858 | 52074 |

|                          |                              |                                    |                                              |       |
|--------------------------|------------------------------|------------------------------------|----------------------------------------------|-------|
| FOXO3                    | affects activity of          | gluconeogenesis                    | 24692138                                     | 52322 |
| FOXO3                    | increases expression of      | CLOCK                              | 24856209                                     | 52078 |
| FOXO3                    | interacts with               | PPARGC1A                           | 19324885                                     | 52324 |
| GAB1                     | increases activity of        | ERK1/2 pathway                     | 17178724                                     | 73794 |
| GAB1                     | increases phosphorylation of | PIK3CA                             | 10842168                                     | 52122 |
| glucose import           | increases activity of        | glucose homeostasis                | 8360145                                      | 73838 |
| GRB2                     | increases activity of        | ERK1/2 pathway                     | 9126968                                      | 73757 |
| GRB2                     | interacts with               | GAB1                               | 11314042                                     | 52123 |
| GRB2                     | interacts with               | SHC1                               | 8995379                                      | 52116 |
| GRB2                     | interacts with               | SHC3                               | 8995379                                      | 52118 |
| GRB2                     | interacts with               | SHC4                               | 17452444                                     | 52485 |
| IGF1                     | interacts with               | IGF1R                              | 17315038                                     | 52315 |
| IGF1R                    | increases activity of        | IRS1                               | 21912508                                     | 26009 |
| IGF1R                    | interacts with               | SHC1                               | 7541045                                      | 52318 |
| Insulin                  | decreases expression of      | AQP9                               | 25008241                                     | 52406 |
| Insulin                  | increases activity of        | AKT3                               | 9480839                                      | 49191 |
| Insulin                  | increases activity of        | IGF1R                              | 21912508                                     | 26008 |
| Insulin                  | increases activity of        | PDE3A                              | 8070584                                      | 52530 |
| Insulin                  | increases activity of        | RELA                               | OA<br>Inflammation<br>2013 Jun<br>01;1(1):7. | 52520 |
| Insulin                  | interacts with               | insulin receptor complex           | 19041393                                     | 5929  |
| insulin receptor complex | increases activity of        | insulin receptor signaling pathway | 19041393                                     | 73819 |
| Insulin receptor complex | increases phosphorylation of | IRS1                               | 7651388                                      | 52114 |



|                                    |                              |                                   |          |       |
|------------------------------------|------------------------------|-----------------------------------|----------|-------|
| insulin receptor complex           | increases phosphorylation of | SHC1                              | 9165038  | 52119 |
| insulin receptor signaling pathway | affects activity of          | AKT3                              | 12663464 | 52049 |
| insulin resistance                 | affects activity of          | PER2                              | 23738904 | 52374 |
| IRS1                               | interacts with               | AP3S1                             | 9792713  | 52053 |
| IRS1                               | interacts with               | PIK3CD                            | 10744689 | 52486 |
| KCNA6                              | affects activity of          | Voltage-gated potassium channel   | 2347305  | 45473 |
| KCNA6 (mutation)                   | affects activity of          | sleep duration                    | 15858564 | 45945 |
| KCNJ6                              | affects activity of          | insulin secretion                 | 7626127  | 51763 |
| KCNMB3 (polymorphism)              | affects activity of          | Diabetes mellitus, type II        | 23826284 | 52422 |
| KCNQ1 (mutation)                   | affects activity of          | Diabetes mellitus, type II        | 23271129 | 45580 |
| KCNQ1 (mutation)                   | affects activity of          | QT syndrome, long                 | 14642002 | 45578 |
| KCNQ3                              | interacts with               | KCNQ5                             | 12890507 | 43195 |
| KCNQ3                              | is part of                   | KCNQ3-KCNQ5 complex               | 12890507 | 43196 |
| KCNQ3-KCNQ5 complex                | affects activity of          | M-currents                        | 12890507 | 43200 |
| KCNQ3-KCNQ5 complex                | increases activity of        | Voltage-gated potassium channel   | 12890507 | 43199 |
| KCNQ5                              | is part of                   | KCNQ3-KCNQ5 complex               | 12890507 | 43197 |
| KCNS3                              | is expressed in              | pancreatic beta cells             | 14928843 | 52331 |
| NPY                                | affects activity of          | insulin secretion                 | 23211512 | 52357 |
| NRG3                               | increases activity of        | ERBB4                             | 9275162  | 45094 |
| NRG3                               | increases activity of        | pancreatic alpha cell development | 23610133 | 45126 |

|                            |                               |                                      |          |       |
|----------------------------|-------------------------------|--------------------------------------|----------|-------|
| pancreatic beta cells      | affects quantity of           | Insulin                              | 19817786 | 54464 |
| PDPK1                      | increases quantity of         | PRKCA                                | 17617409 | 52110 |
| PER2                       | affects activity of           | circadian rhythm                     | 22117616 | 61417 |
| PIK3CA                     | increases activity of         | PDPK1                                | 23131847 | 52097 |
| PIK3CA                     | interacts with                | IRS1                                 | 23643389 | 73795 |
| PIK3CD                     | affects activity of           | Diabetes mellitus, type I            | 23039284 | 45124 |
| PPARGC1A<br>(polymorphism) | decreases activity of         | insulin secretion                    | 18270681 | 23643 |
| PPARGC1A                   | affects activity of           | insulin resistance                   | 19770177 | 5104  |
| PPARGC1A                   | affects activity of           | peripheral circadian<br>clock        | 21325336 | 52325 |
| PPARGC1A                   | affects activity of           | fatty acid oxidation                 | 19770177 | 13131 |
| PPARGC1A<br>(mutation)     | increases activity of         | Diabetes mellitus, type II           | 12107756 | 5219  |
| PPARGC1B                   | affects activity of           | lipid biosynthetic process           | 19254570 | 5250  |
| PPARGC1B                   | affects activity of           | peripheral circadian<br>clock        | 21325336 | 52326 |
| PPARGC1B                   | increases activity of         | triglyceride biosynthetic<br>process | 19770177 | 4953  |
| RAPGEF1<br>(polymorphism)  | increases activity of         | Diabetes mellitus, type II           | 19297053 | 73820 |
| RPS6KA2                    | affects phosphorylation<br>of | IRS1                                 | 24036112 | 52373 |
| RYR2                       | affects activity of           | heart failure                        | 16701909 | 45081 |
| RYR2 (mutant)              | increases activity of         | hyperinsulinemia                     | 23516528 | 52428 |
| RYR2                       | interacts with                | RYR3                                 | 12213830 | 43190 |
| RYR2 (mutation)            | affects activity of           | Ventricular tachycardia              | 21768539 | 45079 |
| RYR3                       | affects activity of           | insulin sensitivity                  | 23389954 | 52431 |
| SHC3                       | increases activity of         | ERK1/2 pathway                       | 12598680 | 73758 |

|                                 |                       |                            |          |       |
|---------------------------------|-----------------------|----------------------------|----------|-------|
| SHC4                            | decreases activity of | ERK1/2 pathway             | 28213521 | 73759 |
| SLC5A2                          | increases activity of | glucose import             | 25344694 | 60201 |
| SMAD2                           | affects activity of   | insulin secretion          | 24068386 | 52377 |
| TRPC4                           | affects activity of   | hypertension               | 24113457 | 45586 |
| Voltage-gated potassium channel | affects activity of   | Morvan's fibrillary chorea | 23712055 | 43336 |

**Table S9.** Primers used in quantitative RT-PCR.

| <b>ID Gene</b> | <b>Forward Primer (5'-3')</b> | <b>Reverse Primer (5'-3')</b> |
|----------------|-------------------------------|-------------------------------|
| <i>dSur</i>    | ACGTGGACAATCCAAGTGAAC         | CGAGTGTCCCTCCGTCATGT          |
| <i>Egfr</i>    | AATCTCAGGGCGGATCTATG          | ACTGATCCGTGCCAGCTC            |
| <i>InaC</i>    | TTTCTTCCGGAATGTGGACT          | TTGCTTATATCCTTGCGATGTTT       |
| <i>Hk</i>      | CCTCGAATTGCCAGTGCT            | TCACACTCATCTTCGGCTTG          |
| <i>Sh-isoF</i> | CCCCACTCGCACTTTAAATAAT        | GCCATTTCGCTCATTTCCT           |

## SUPPLEMENTARY MATERIALS AND METHODS

*Description of the cohorts included in the current GWAS*

BREC: Participants were locals of 12 counties in the Taquari Valley (Brazil); European descents (Germans and Italians) who immigrated to this region between 1824 and 1870. From the initial 6505 participants, 4051 subjects (1340 men and 2711 women; mean age:  $44.1 \pm 13.4$ , ranging from 18 to 65 years) had valid informative for sleep duration and chronotype.<sup>2</sup> Individuals selected as tails from the age and sex adjusted chronotype distribution had their blood samples collected and DNA isolated. After quality control (of DNA for whole-genome genotyping and of genotypes, as well as stratification analyses; Supplementary Figure S3) a remaining sample of 484 subjects was included in the GWA analyses.

GEC: Participants were assessed through an online survey focusing on extremes of chronotype. Based on a databank of about 65 000 chronotyped individuals in Germany, we selected 5500 extreme chronotype to participate in the online survey that generated the current cohort. We selected 670 participants who fulfilled the inclusion criteria described in phenotyping method to participate in our GWAS study. We mailed to 489 of those participants self-collecting saliva sample-kits (Oragene; DNA Genotek, Inc., Ottawa, Ontario, Canada) and received 463 saliva samples (95% of total). After DNA isolation and quality control criteria for whole-genome genotyping, 378 high-quality DNA samples were genotyped with an average call rate of  $99.0 \pm 3\%$ . However, approximately 14% of the saliva-extracted DNA did not meet quality control criteria (inspection of absorbance scans and gel electrophoresis) even after using a re-purification protocol- and could not be used for WGGT. The genotype concordance between saliva and blood extracted DNA from 10 individuals was compared to validate the method (Supplementary Figure 2). After genotyping and stratification quality control, 331 individuals were included in the GWA analyses.

EGCUT: The Estonian Genome Center, University of Tartu (EGCUT) is a bio-bank consisting of data of *ca* 51800 individuals from a population based Estonian cohort aged 18 years and older (67% females).<sup>3</sup> For the current study, GWAS was performed on 749 subjects, genotyped (array according to Illumina protocol) and phenotyped (with the MCTQ questionnaire) in the Estonian Genome Center. The cohort consisted of individuals selected as tails from the age and sex adjusted chronotype distribution of 5098 individuals. Study sample characteristics are presented in Supplementary Table 1.

### *Phenotyping*

To normalize the average sleep duration individual values for the phenotype were deducted from the mean of the population and divided by the standard deviation of the mean. In the same way, we have normalized the mid-sleep on free days (chronotype) to use it as a covariate in the association analysis with sleep duration.

### *Characterisation of *Drosophila* knockdown*

The knockdown was quantified and found to be ~40% (Supplementary Figure 7 and Supplementary Table 9). The qRT-PCR reaction was performed using a GoTaq qPCR Master Mix (Promega) using one  $\mu$ l aliquot of 1:100 diluted first-strand cDNA following the manufacturer's instructions on 7500 Real-Time PCR System (Applied Biosystems). The *dSur* RNA was amplified with exon spanning primers (Forward: *acgtggacaatccaagtgaac*, Reverse: *cgagtgtcctccgtcatgt*), and RNA levels were calculated relative to the *RP49* housekeeping gene. PCR reactions were performed in triplicate. Thermal cycling conditions were as follows: 2 min denaturation at 95°C followed by 38 cycles for 25 sec denaturation at 95°C, 1 min annealing and elongation at 60°C, and a final 3 min elongation at 72°C. The  $2^{-\Delta\Delta C_t}$  (RQ, relative quantification) method implemented in the 7500 Real Time PCR System software was used to

calculate the relative expression ratio.<sup>4</sup> 95% confidence intervals are associated to each time point.

#### *Total RNA isolation*

Flies were collected every 3 hours after 3 days of entrainment in 12h:12h light/dark cycles at 23°C. Total RNA was extracted from the head of 30 flies for each genotype (d*Sur* KD and parental control), at each time point (ZT0, ZT3, ZT6, ZT9, ZT12, ZT15, ZT18, ZT21) and for each biological replicate. Four biological replicates were analysed for both d*Sur* KD and control samples for each experimental condition: “Pooled” (ZT0, ZT3, ZT6, ZT9, ZT12, ZT15, ZT18, ZT21) and “Night” (ZT15) for a total of 16 microarray experiments. All RNA samples were checked for quality by capillary electrophoresis (RNA 6000 Nano LabChip, Agilent Bioanalyzer 2100, Agilent Technologies). Only total RNA samples with R.I.N. (RNA Integrity Number) values higher than 7 were used for microarray analysis.

#### *DNA microarray design*

Probes were designed using the Agilent eArray Custom Microarray Design Service (<https://earray.chem.agilent.com/earray/index.jsp>), which applies proprietary prediction algorithms to design 60 mer oligo-probes. Microarrays were synthesized *in situ* using the Agilent ink-jet technology with 8 x 60 K format. A total of 32,162 probes representing *D. melanogaster* transcripts were successfully obtained. A custom microarray platform, named “*Drosophila* 1.0” (eArray Design ID: 035757), showed 30,814 duplicate probes and 1348 single probes. Each array included default positive (1,011 probes) and negative (308 probes) controls. Probe sequences and other details on the microarray platform can be found in the Gene Expression Omnibus (GEO) database (<http://www.ncbi.nlm.nih.gov/geo/>) under accession number: GPL17290.

*Microarray labeling and hybridization*

800 ng of total RNA was labeled with “Agilent One-Color Microarray-Based Gene Expression protocol” according to the manufacturer’s instructions. The synthesized cDNA was transcribed into cRNA and labeled with Cy3-dCTP. Labeled cRNA was purified with RNeasy Mini columns (Qiagen). The quality of each cRNA sample was verified by total yield and specificity calculated with NanoDrop ND-1000 spectrophotometer measurements. 1.65 µg of labeled cRNA was used in each reaction and hybridization was carried out at 65°C for 17h in a hybridization oven rotator (Agilent). The arrays were washed using Agilent Gene expression washing buffers and Stabilization and Drying Solution, as suggested by the supplier. Slides were scanned on an Agilent microarray scanner (model G2565CA) and Agilent Feature Extraction software version 10.5.1.1 was used for image analysis. Gene expression data are available in the GEO database with the accession number: GSE52764.

*Analysis of gene expression data*

The Feature Extraction Software, which provided spot quality measures, was used to evaluate the quality and reliability of the hybridization. In particular, the flag "glsFound" (set to 1 if the spot had an intensity value significantly different from the local background and to 0 when otherwise) was used to filter out unreliable probes: the flag equal to 0 was to be noted as "null". Probes with a high proportion of “null” values were removed from the dataset in order to carry out a more solid, unbiased, statistical analysis. About forty percent (38%) of "null" was used as threshold in the filtering process, and a total of 22,523 available *Drosophila* transcripts were obtained.

*Validation of relative gene expression by quantitative RT-PCR*



Quantitative RT-PCR was used to validate the expression values of seven differentially expressed genes obtained from microarray experiments (Figure 2). 1µg of total RNA isolated from 30 heads flies (males) for *dSur KD (elav-Gal4/RNAi-104241)* and parental control strain (*RNAi-104241*) in two time points: "Pooled" (pooled samples every three hours over a 24h period) and "Night" (three hours in the dark phase, ZT15) was used to perform independent cDNA syntheses in a final volume of 10µl, using random hexamers and SuperScript II reverse transcriptase (Life Technologies). Three biological replicates were analysed. One µl aliquot of 1:100 diluted first-strand cDNA was PCR amplified in 10µl volume using the SYBR Green chemistry according to the manufacturer's recommendations (GoTaq qPCR Master Mix, Promega). Gene-specific primers (Supplementary Table 9) were designed using the Primer3 design tool to obtain 60-80 bp amplicons. A dissociation curve was used to confirm the specificity of the amplicon. We verified the efficiency of the primers by drawing standard curves for target genes and endogenous control (Rp49). PCR reactions were performed in triplicate in a 7500 Real-Time PCR System (Applied Biosystems). Thermal cycling conditions were as follows: 2 min denaturation at 95°C followed by 38 cycles for 25 sec denaturation at 95°C, 1 min annealing and elongation at 60°C, and a final 3 min elongation at 72°C. The  $2^{-\Delta\Delta Ct}$  (RQ, relative quantification) method implemented in the 7500 Real Time PCR System software was used to calculate the relative expression ratio<sup>4</sup> 95% confidence intervals are associated to each time point.

## ACKNOWLEDGMENTS

We thank all participants from all cohorts for donating their time and DNA. Svilen Stoynev and Magdalena Zaharieva for isolation of DNA from saliva samples and management of the online survey in Germany. We thank Dr. Giovana Dantas, Dr. Camila Morelato, Dr Wolnei Caumo, Dr Iraci Torres for samples collection and cohort management in Brazil. We thank

Beniamina Pacchioni and Caterina Millino (MicroCribi Microarray Service, C.R.I.B.I., University of Padova, Italy) for their assistance with the microarray experiments, Marco Zanini for qRT-PCR experiments (Department of Biology, University of Padova, Italy) and Chiara Romualdi (Department of Biology, University of Padova, Italy) for support with bioinformatics programming and raw transcriptomic's data analysis.

SUPPLEMENTARY REFERENCES

1. Allebrandt KV, Amin N, Muller-Myhsok B, Esko T, Teder-Laving M, Azevedo RV *et al.* A K(ATP) channel gene effect on sleep duration: from genome-wide association studies to function in *Drosophila*. *Mol Psychiatry* 2013; **18**(1): 122-132.
2. Levandovski R, Dantas G, Fernandes LC, Caumo W, Torres I, Roenneberg T *et al.* Depression scores associate with chronotype and social jetlag in a rural population. *Chronobiol Int* 2011; **28**(9): 771-778.
3. Milani L, Leitsalu L, Metspalu A. An epidemiological perspective of personalized medicine: the Estonian experience. *J Intern Med* 2015; **277**(2): 188-200.
4. Livak KJ, Schmittgen TD. Analysis of relative gene expression data using real-time quantitative PCR and the  $2^{-\Delta\Delta C(T)}$  Method. *Methods* 2001; **25**(4): 402-408.
